# Supplementary material
Source: publisher figshare collection journal article supplement (https://frontiersin.figshare.com/ndownloader/files/38810241)
Supplement: Supplementary file 1 [file 38810241]

Archive with 8 entries (8 files):
- Geology_South Shetland Islands.dbf
- __MACOSX/._Geology_South Shetland Islands.dbf
- Geology_South Shetland Islands.prj
- __MACOSX/._Geology_South Shetland Islands.prj
- Geology_South Shetland Islands.shp
- __MACOSX/._Geology_South Shetland Islands.shp
- Geology_South Shetland Islands.shx
- __MACOSX/._Geology_South Shetland Islands.shx
